# Supplementary material for: Cranberry polyphenols and agave agavins impact gut immune response and microbiota composition while improving gut barrier function, inflammation, and glucose metabolism in mice fed an obesogenic diet
Source: PubMed Central journal article supplement (PMC9424773; doi:10.3389/fimmu.2022.871080), 2022-08-16
Supplement: DataSheet_1.pdf [file DataSheet_1.pdf]

## Supplementary Material

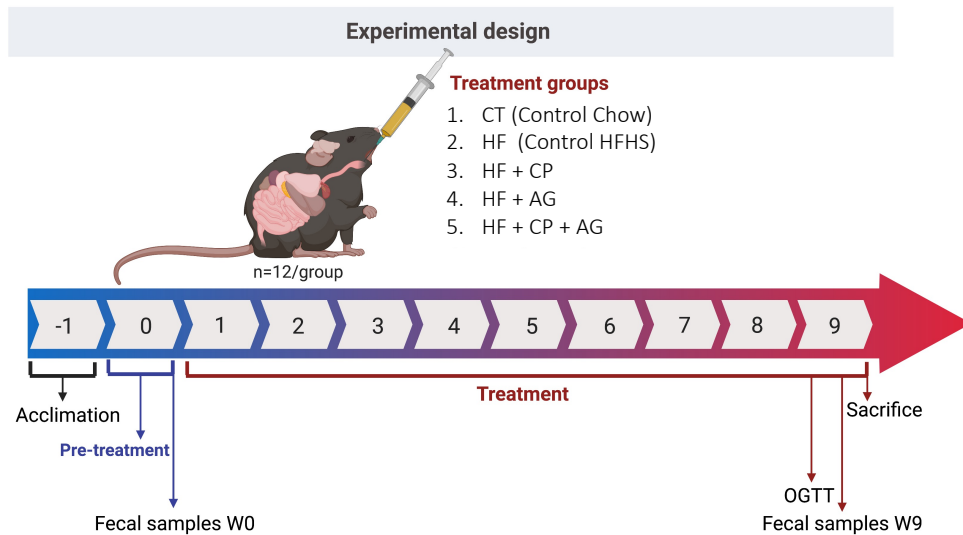

**Figure S1.** Experimental protocol. Sixty 6-weeks old C57BL/6J male mice, were randomly divided into five intervention groups (12 mice per group). Week -1 corresponded to acclimation week, during this period all mice were fed a standard chow diet. Then, during week 0, mice were still fed a chow diet and pre-treated with the vehicle (water) (groups 1 and 2), or with their corresponding supplements, either with cranberry polyphenols alone (CP) (group 3), with agavins alone (AG) (group 4); or with both, cranberry polyphenols and agavins (CP+AG) (group 5). At the end of week 0, mice were assigned to their definitive diet as follows: group 1 continued chow diet, while groups 2, 3, 4 and 5 were fed a HFHS diet. Finally, for the intervention period, from week 1 to 9, mice received their corresponding diets and treatments for 9 weeks.

**Table S1. Characterization of cranberry-polyphenols extract**

| <b>Phenolic content (mg/100 g dry weight)</b>      |                                     |
|----------------------------------------------------|-------------------------------------|
| <b>Polyphenol type</b>                             | <b>Whole Cranberry extract (CE)</b> |
| <b>Total phenolic content (%)</b>                  | <b>31.33% ± 1.01</b>                |
| Anthocyanins                                       | 1628.2 ± 5.8                        |
| Cyanidin 3-galactoside                             | 35.5 ± 1.8                          |
| Cyanidin 3-glucoside                               | 602.8 ± 1.8                         |
| Cyanidin 3-arabinoside                             | 403.6 ± 1.0                         |
| Peonidin 3-galactoside                             | 108.3 ± 1.8                         |
| Peonidin 3-glucoside                               | 460.5 ± 1.9                         |
| Peonidin 3-arabinoside                             | 17.6 ± 2.2                          |
| <b>Proanthocyanins</b>                             | <b>10738.9 ± 100.8</b>              |
| Monomers                                           | 998.5 ± 5.6                         |
| Dimers                                             | 2528.8 ± 28.9                       |
| Trimers                                            | 1567.5 ± 17.1                       |
| Tetramers                                          | 958.0 ± 2.3                         |
| Pentamers                                          | 433.4 ± 1.8                         |
| Hexamers                                           | 295.4 ± 7.0                         |
| Heptamers                                          | 89.7 ± 2.0                          |
| Octamers                                           | 68.7 ± 2.4                          |
| Nonamers                                           | 64.5 ± 1.0                          |
| Decamers                                           | 33.7 ± 3.1                          |
| Polymers >10                                       | 3700.8 ± 29.6                       |
| <b>Flavonols, flavan-3-nols and phenolic acids</b> | <b>4964.5</b>                       |
| Catechin                                           | 63.5 ± 5.3                          |
| Epicatechin                                        | 429.5 ± 12.8                        |
| Gallic acid                                        | 1.0 ± 0.3                           |
| Protocatechuic acid                                | 275.3 ± 7.5                         |
| <i>P</i> -coumaric acid                            | 1189.8 ± 49.4                       |
| Caffeic acid                                       | 139.4 ± 4.1                         |
| Ferulic acid                                       | 23.9 ± 4.9                          |
| 3-caffeoylquinic acid                              | 0.2 ± 0.1                           |
| 4-caffeoylquinic acid                              | 21.9 ± 1.8                          |
| 5-caffeoylquinic acid                              | 524.2 ± 6.8                         |
| Quercetine                                         | 831.3 ± 31.9                        |
| Quercetine-glucoside                               | 629.7 ± 18.1                        |
| Quercetine-galactoside                             | ND                                  |
| Quercetine-rhamnoside                              | 376.4 ± 5.1                         |
| Quercetine-xyloside                                | 378.8 ± 13.0                        |
| Quercetine-arabinoside                             | 79.6 ± 7.8                          |
| Rutin                                              | ND                                  |

*Results are expressed as mean of triplicate ± SD. ND, not detected.*

**Table S2. Primer sequences used for RT-qPCR amplification**

| Gene                                  | Sequences                         | Reference                  |
|---------------------------------------|-----------------------------------|----------------------------|
| <i>Tnfa</i> Forward                   | TAC TGA ACT TCG GGG TGA TTG GTC C | Lin et al, 2019 (1)        |
| <i>Tnfa</i> Reverse                   | CAG CCT TGT CCC TTG AAG AGA ACC   |                            |
| <i>Il-1<math>\beta</math></i> Forward | TCG GAC CCA TAT GAG CTG A         | Wang and Hatabu, 2019 (2)  |
| <i>Il-1<math>\beta</math></i> Reverse | CCA CAG GTA TTT TGT CGT TGC       |                            |
| <i>Nlrp6</i> Forward                  | TGA CCA GAG CTT CCA GGA GT        | Wang and Hatabu, 2019 (2)  |
| <i>Nlrp6</i> Reverse                  | TTT AGC AGG CCA AAG AGG AA        |                            |
| <i>Ahr</i> Forward                    | GGC TTT CAG CAG TCT GAT GTC       | Lin et al, 2019 (1)        |
| <i>Ahr</i> Reverse                    | CAT GAA AGA AGC GTT CTC TGG       |                            |
| <i>Tlr2</i> Forward                   | GCT GGA GGA CTC CTA GGC T         | Wang et al., 2010 (3)      |
| <i>Tlr2</i> Reverse                   | GTC AGA AGG AAA CAG TCC GC        |                            |
| <i>Claudin-1</i> Forward              | CTG GGT TTC ATC CTG GCT TC        | Lin et al, 2019 (1)        |
| <i>Claudin-1</i> Reverse              | TTG ATG GGG GTC AAG GGG T         |                            |
| <i>Muc2</i> Forward                   | GCC CGT GGA GTC GTA CGT GC        | Lin et al, 2019 (1)        |
| <i>Muc2</i> Reverse                   | TTG GGG CAG AGT GAG GCG GT        |                            |
| <i>Myd88</i> Forward                  | TGG CCT TGT TAG ACC GTG A         | Friedrich et al., 2017 (4) |
| <i>Myd88</i> Reverse                  | AAG TAT TTC TGG CAG TCC TCC TC    |                            |
| <i>Actb</i> Forward                   | CCA CCA TGT ACC CAG GCA TT        | The present study          |
| <i>Actb</i> Reverse                   | ACT CCT GCT TGC TGA TCC AC        |                            |
| <i>Ppib</i> Forward                   | GGC ATG GAT GTG GTA CGG AA        | The present study          |
| <i>Ppib</i> Reverse                   | CCC CAG GCT CTC TAC TCC TT        |                            |
| <i>Gapdh</i> Forward                  | CCA CAG TCC ATG CCA TCA CT        | The present study          |
| <i>Gapdh</i> Reverse                  | TAG GAA CAC GGA AGG CCA TG        |                            |
| <i>Hprt</i> Forward                   | AGT CCC AGC GTC GTG ATT AG        | The present study          |
| <i>Hprt</i> Reverse                   | CCC CTT GAG CAC ACA GAG G         |                            |
| <i>Polr2b</i> Forward                 | TCT CAC GTA TTC TGC TCC GC        | The present study          |
| <i>Polr2b</i> Reverse                 | TTC AGC TCA CAC AGG TCA CG        |                            |

1. Lin YH, Luck H, Khan S, Schneeberger PHH, Tsai S, Clemente-Casares X, Lei H, Leu YL, Chan YT, Chen HY, et al. Aryl hydrocarbon receptor agonist indigo protects against obesity-related insulin resistance through modulation of intestinal and metabolic tissue immunity. *Int J Obes* (2019) **43**:2407–2421. doi:10.1038/s41366-019-0340-1
2. Wang Y, Hatabu T. Mulberry juice freeze-dried powder attenuates the disease severity by the maintaining of colon mucosa in mice with DSS-induced acute colitis. *Biosci Biotechnol Biochem* (2019) **83**:914–922. doi:10.1080/09168451.2019.1580135
3. Wang Y, Devkota S, Musch MW, Jabri B, Nagler C, Antonopoulos DA, Chervonsky A, Chang EB. Regional Mucosa-Associated Microbiota Determine Physiological Expression of TLR2 and TLR4 in Murine Colon. *PLoS One* (2010) **5**:e13607. doi:10.1371/journal.pone.0013607
4. Friedrich C, Mamareli P, Thiemann S, Kruse F, Wang Z, Holzmann B, Strowig T, Sparwasser T, Lochner M. MyD88 signaling in dendritic cells and the intestinal epithelium controls immunity against intestinal infection with *C. rodentium*. *PLoS Pathog* (2017) **13**:e1006357. doi:10.1371/journal.ppat.1006357

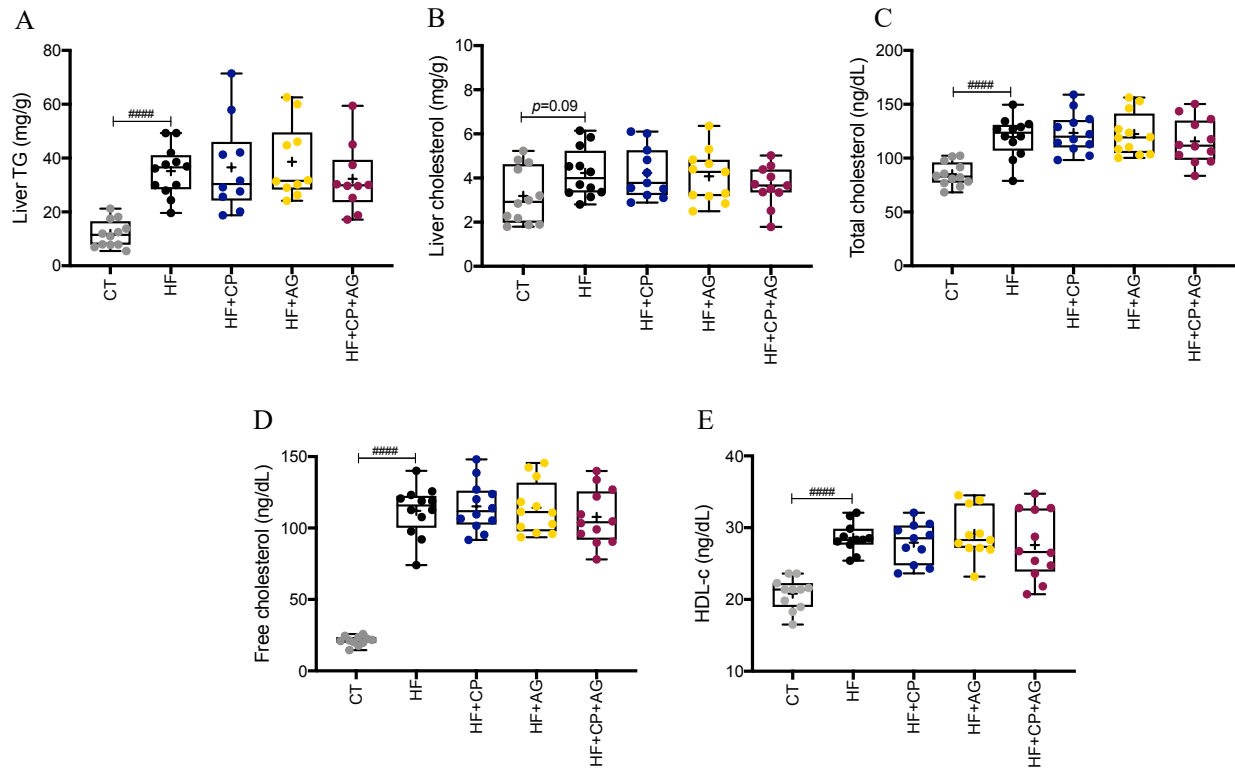

**Figure S2. Effects of cranberry-polyphenols (CP) and agavins (AG) in lipid metabolism in HFHS-diet induced obese mice.** Mice were fed either a Chow diet (CT) or High-fat high-sugar diet (HF); mice on a HF-diet were supplemented with CP (HF+CP), AG (HF+AG) or the combination of both CP+AG (HF+CP+AG) for 9 weeks. Blood samples were collected, and different parameters were measured **A)** Liver triglycerides level (mg/g); **B)** Liver cholesterol level (mg/g); **C)** Total cholesterol level (ng/dL); **D)** Free cholesterol level (ng/dL); **E)** High-density lipoprotein cholesterol levels (ng/dL). One-way ANOVA with a Dunnett's multiple comparison test (post hoc test) was employed to calculate the significance of the differences between groups. Values are expressed as the mean  $\pm$  SEM. Boxplots represent the distribution of data with the mean represented by the mark "+" within the boxes, the median represented by the dark horizontal line and interquartile range by the box. #####  $p < 0.0001$  Chow-control group versus HFHS-control group.

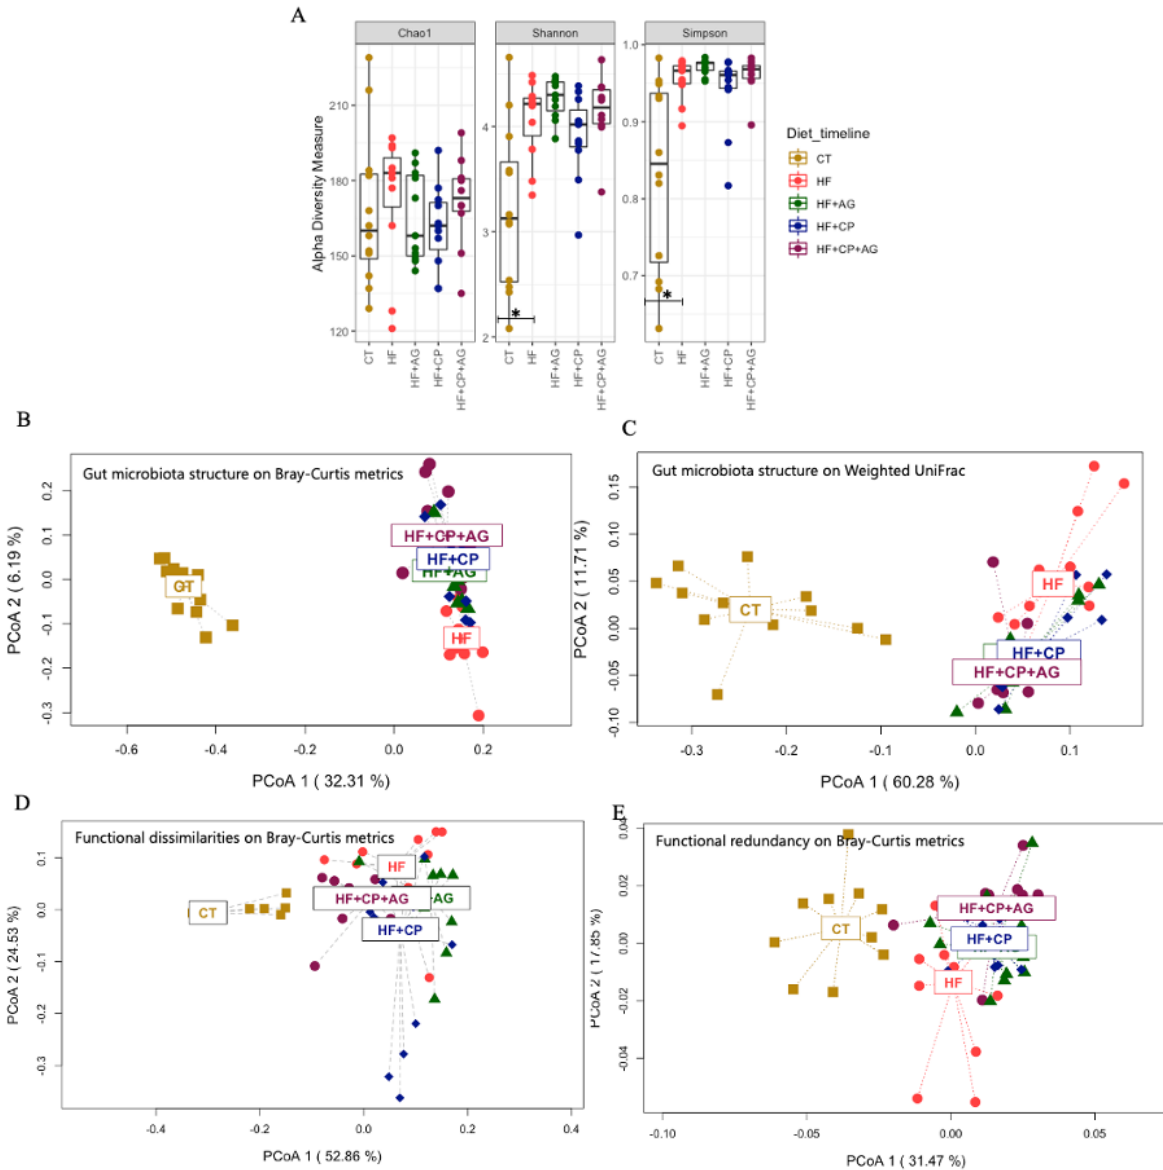

**Figure S3. Effects of cranberry-polyphenols (CP) and agavins (AG) on the gut microbiota structure and predicted taxonomic functions in HFHS-diet induced obese mice.** Mice were fed either a Chow diet (CT) or High-fat high-sugar diet (HF); mice on a HF-diet were supplemented with CP (HF+CP), AG (HF+AG) or the combination of both CP+AG (HF+CP+AG) for 9 weeks. Samples were collected for metagenomic analysis at the end of the intervention (week 9). **A**)  $\alpha$ -diversity indices, determined by Chao1, Shannon-diversity and Simpson, was plotted for each dietary group at 9-weeks. Line inside the box represents the median, while whiskers represent the lowest and highest values within 1.5 interquartile range (IQR); **B**) Principal Coordinates Analysis (PCoA) plot-based Bray–Curtis metrics on taxonomic structure of samples at week 9 (PERMANOVA  $R^2$  0.54452,  $p < 0.001$ ); **C**) PCoA of taxon phylogenetic tree-based Weighted UniFrac of samples at week 9 (PERMANOVA  $R^2$  0.60617,  $p < 0.001$ ); **D**) PCoA plot of functional Bray–Curtis dissimilarities between samples at week 9 (PERMANOVA  $R^2$  0.54452,  $p < 0.001$ );

**E)** Functional redundancy-based PCoA plot (PERMANOVA  $R^2$  0.35397,  $p < 0.001$ ). Corrected  $p$ -values having a tendency are indicated as “ $q$ ”. Each sample point ( $n = 12$  per group) is color-coded based on the administered diet for 9-weeks, as shown in each figure legend.

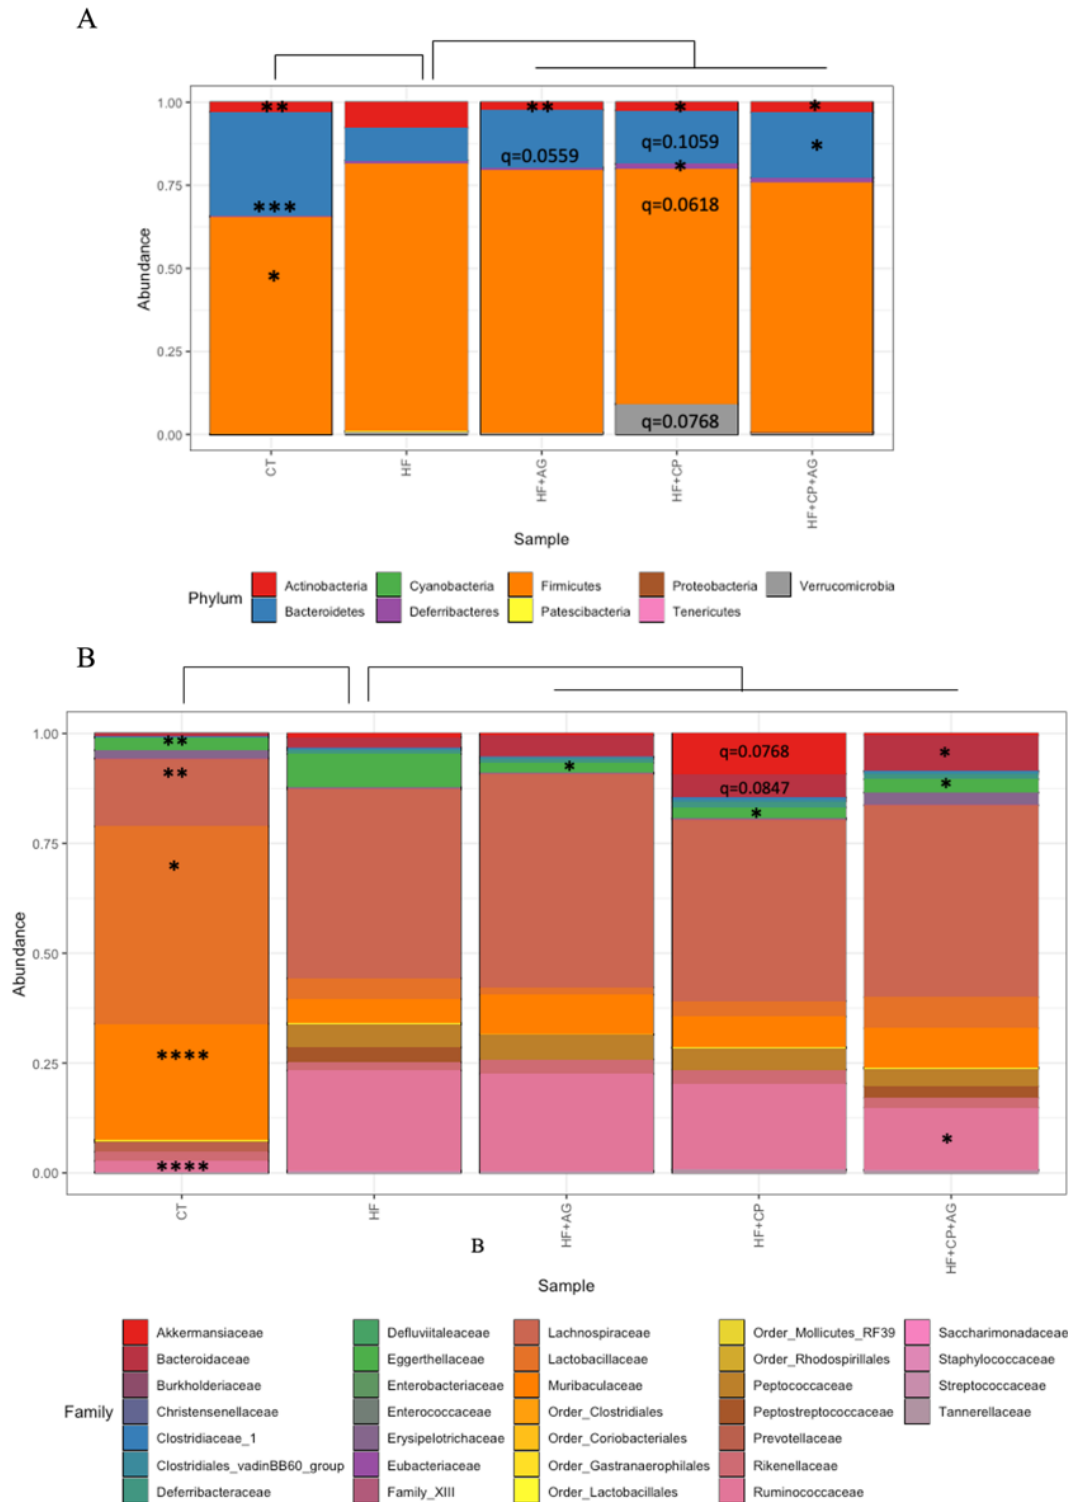

**Figure S4 .** Changes induced by cranberry-polyphenols and agavins on the relative proportions of bacterial taxa at the phylum and family level in the gut microbiota of HFHS-fed mice. CP selectively increased the relative abundance of Verrucomicrobia phyla, CP+AG increased the

relative abundance of phylum Bacteroidetes (recently taxonomically named as Bacteroidota), and the relative abundance of Actinobacteria phyla was increased in all treated mice, as compared to HFHS-fed mice. **A)** Bar graph shows changes in the relative abundance of bacteria phyla at 9-weeks in mice fed HFHS (HF), Chow (CT), HFHS-diet supplemented with either cranberry-polyphenols (CP), agavins (AG), and cranberry-polyphenols with agavins (CP+AG); **B)** Bar graph of the relative abundances of bacterial families across the gut microbiota composition of each group. n=12 per group. Kruskal-Wallis test with FDR Benjamini and Hochberg post-hoc multiple comparison correction was performed to compare taxonomic abundance among groups. \* $p < 0.05$ , \*\* $p < 0.01$ , \*\*\* $p < 0.001$ , \*\*\*\* $p < 0.0001$  as compared to HFHS-control group.



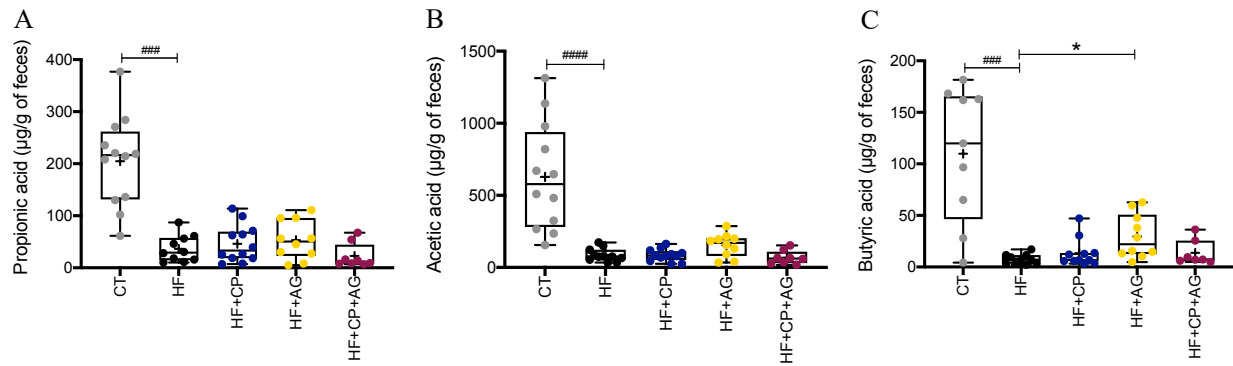

**Figure S5. Cranberry-polyphenols and agavins distinctly modified the levels of short-chain fatty acids in HFHS-diet induced obese mice.** Mice were fed either a Chow diet (CT) or High-fat high-sugar diet (HF); mice on a HF-diet were supplemented with CP (HF+CP), AG (HF+AG) or the combination of both CP+AG (HF+CP+AG) for 9 weeks. Fecal level of **A**) Propionic acid ( $\mu\text{g/g}$  of feces). **B**) Acetic acid ( $\mu\text{g/g}$  of feces). **C**) Butyric acid ( $\mu\text{g/g}$  of feces). One-way ANOVA with a Dunnett's multiple comparison test (post hoc test) was employed to calculate the significance of the differences between groups. Values are expressed as the mean  $\pm$  SEM. Boxplots represent the distribution of data with the mean represented by the mark "+" within the boxes, the median represented by the dark horizontal line and interquartile range by the box. \* $p < 0.05$  as compared to HFHS-control group. ### $p < 0.001$  and #### $p < 0.0001$  Chow-control group versus HFHS-control group.
